# Supplementary material for: Multimodal mapping of cell types and projections in the central nucleus of the amygdala
Source: eLife journal article supplement (doi:10.7554/elife.84262), 2023-01-20

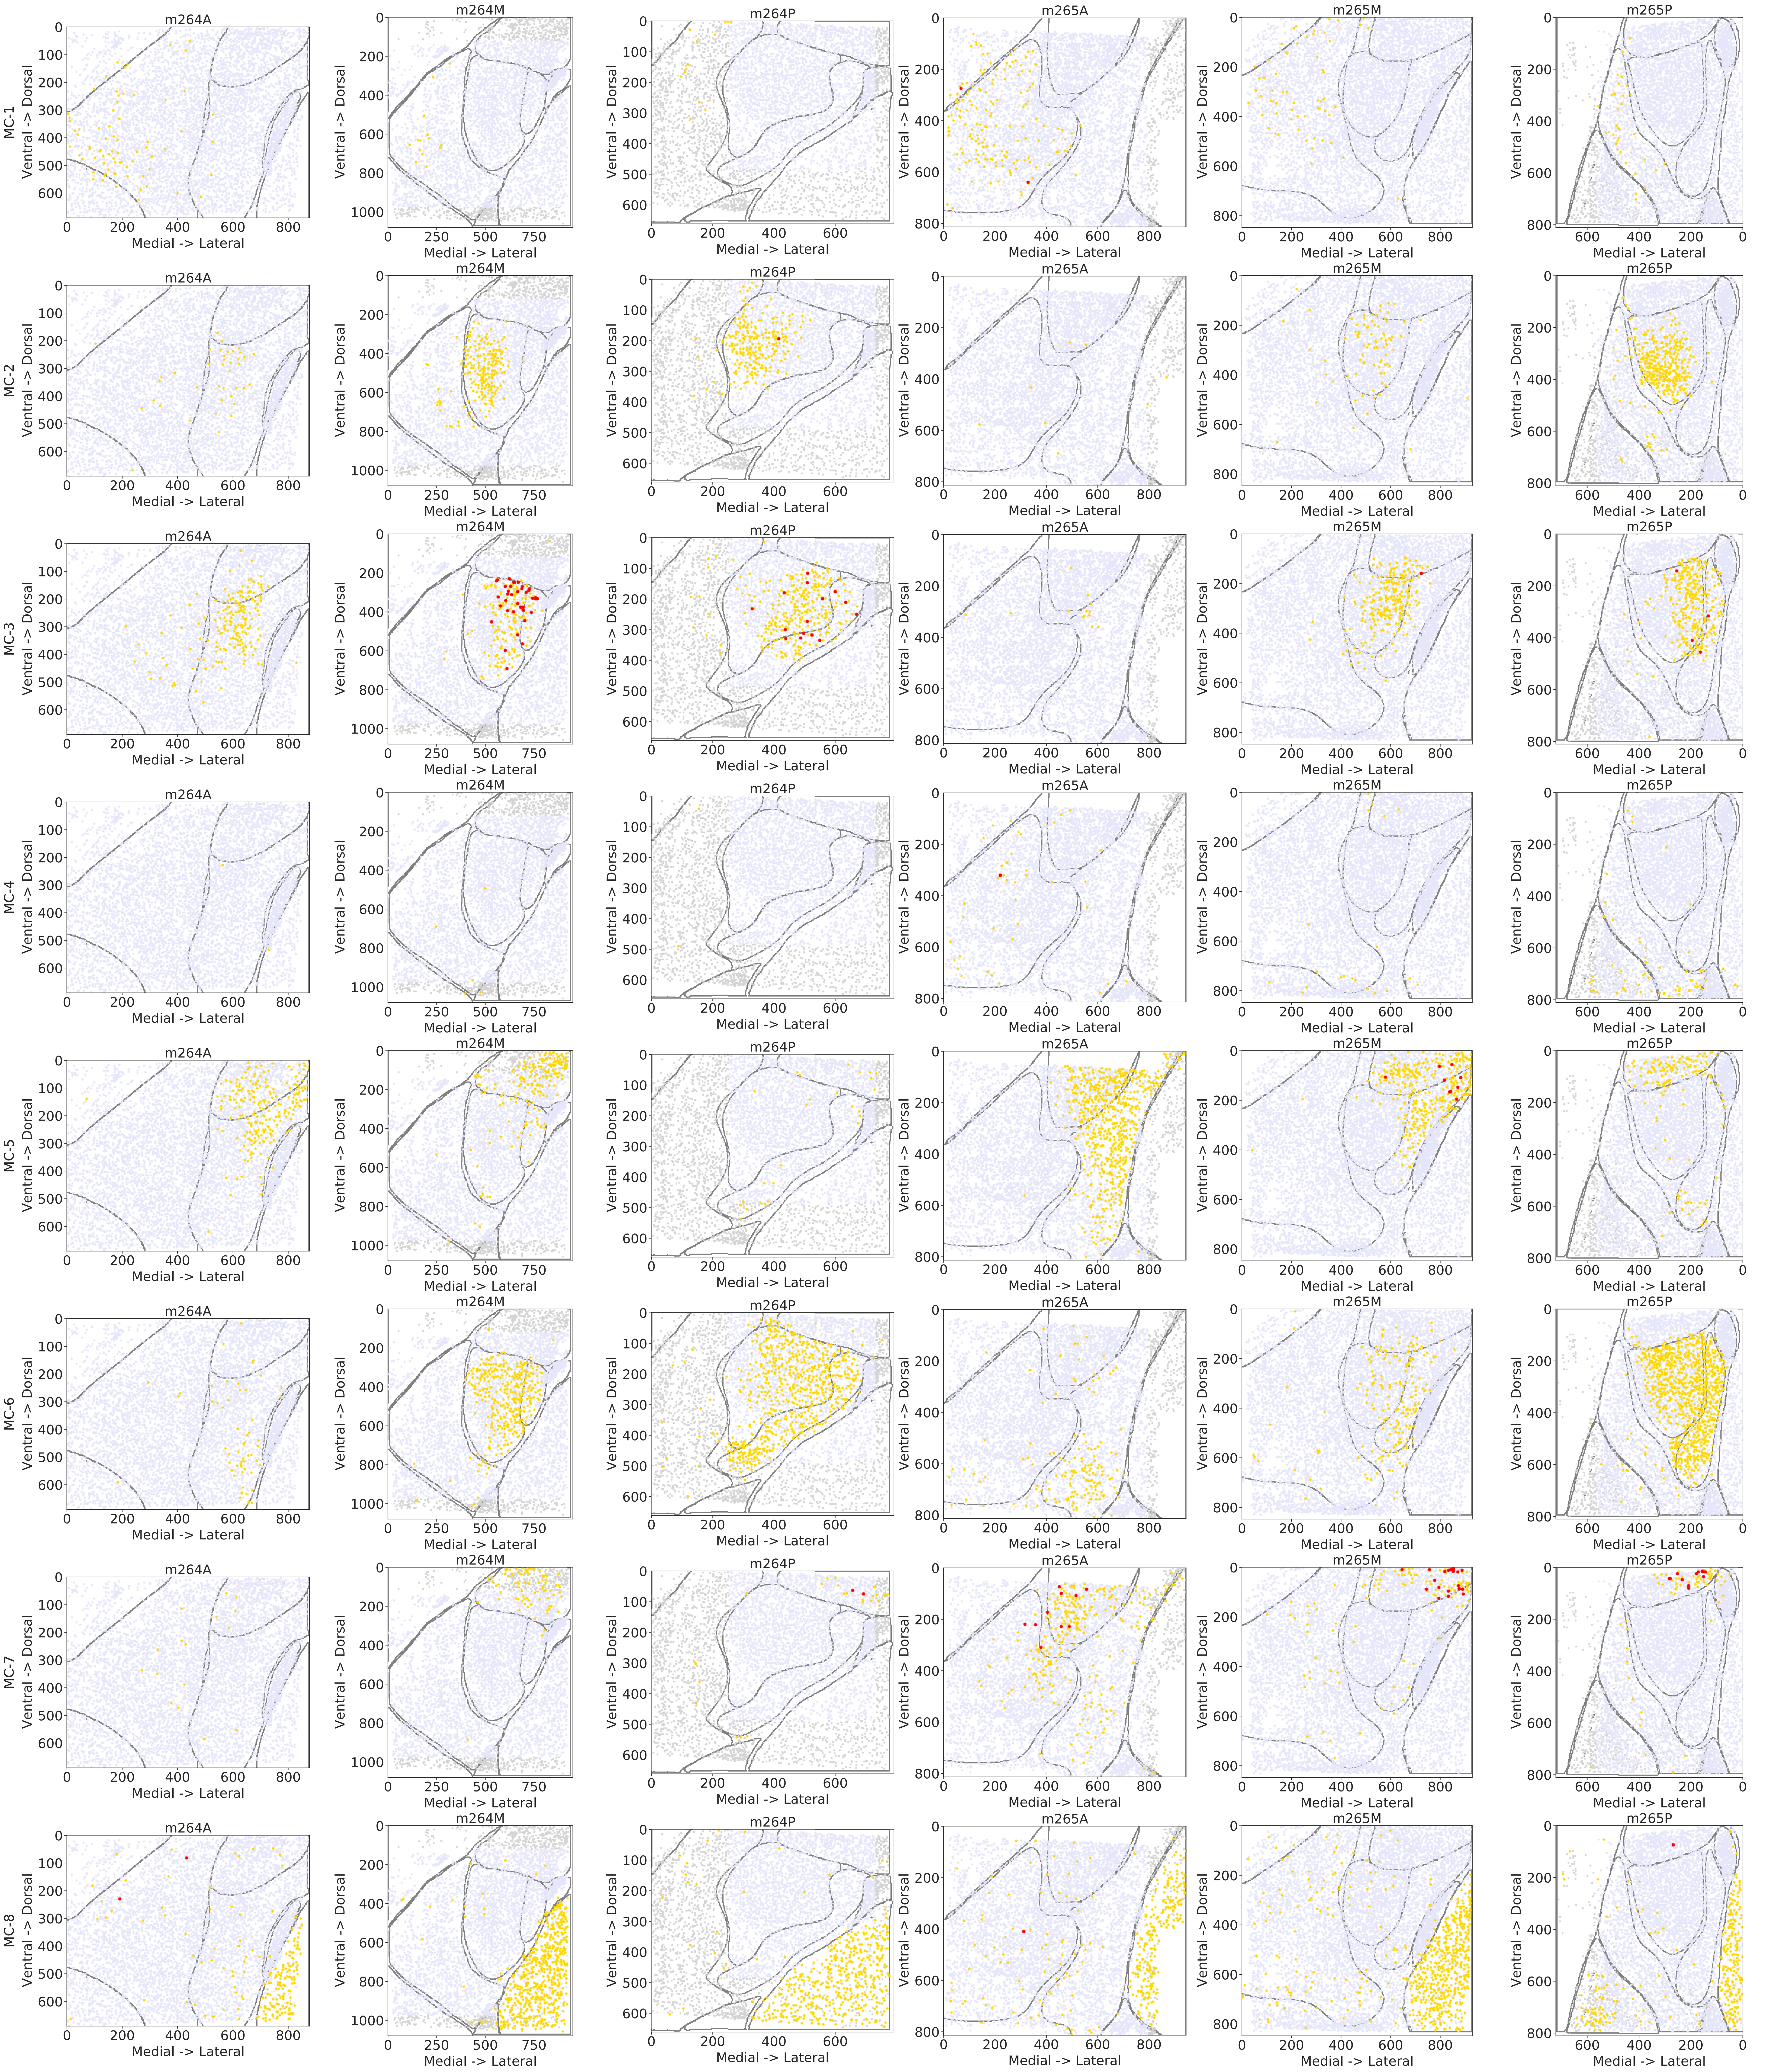

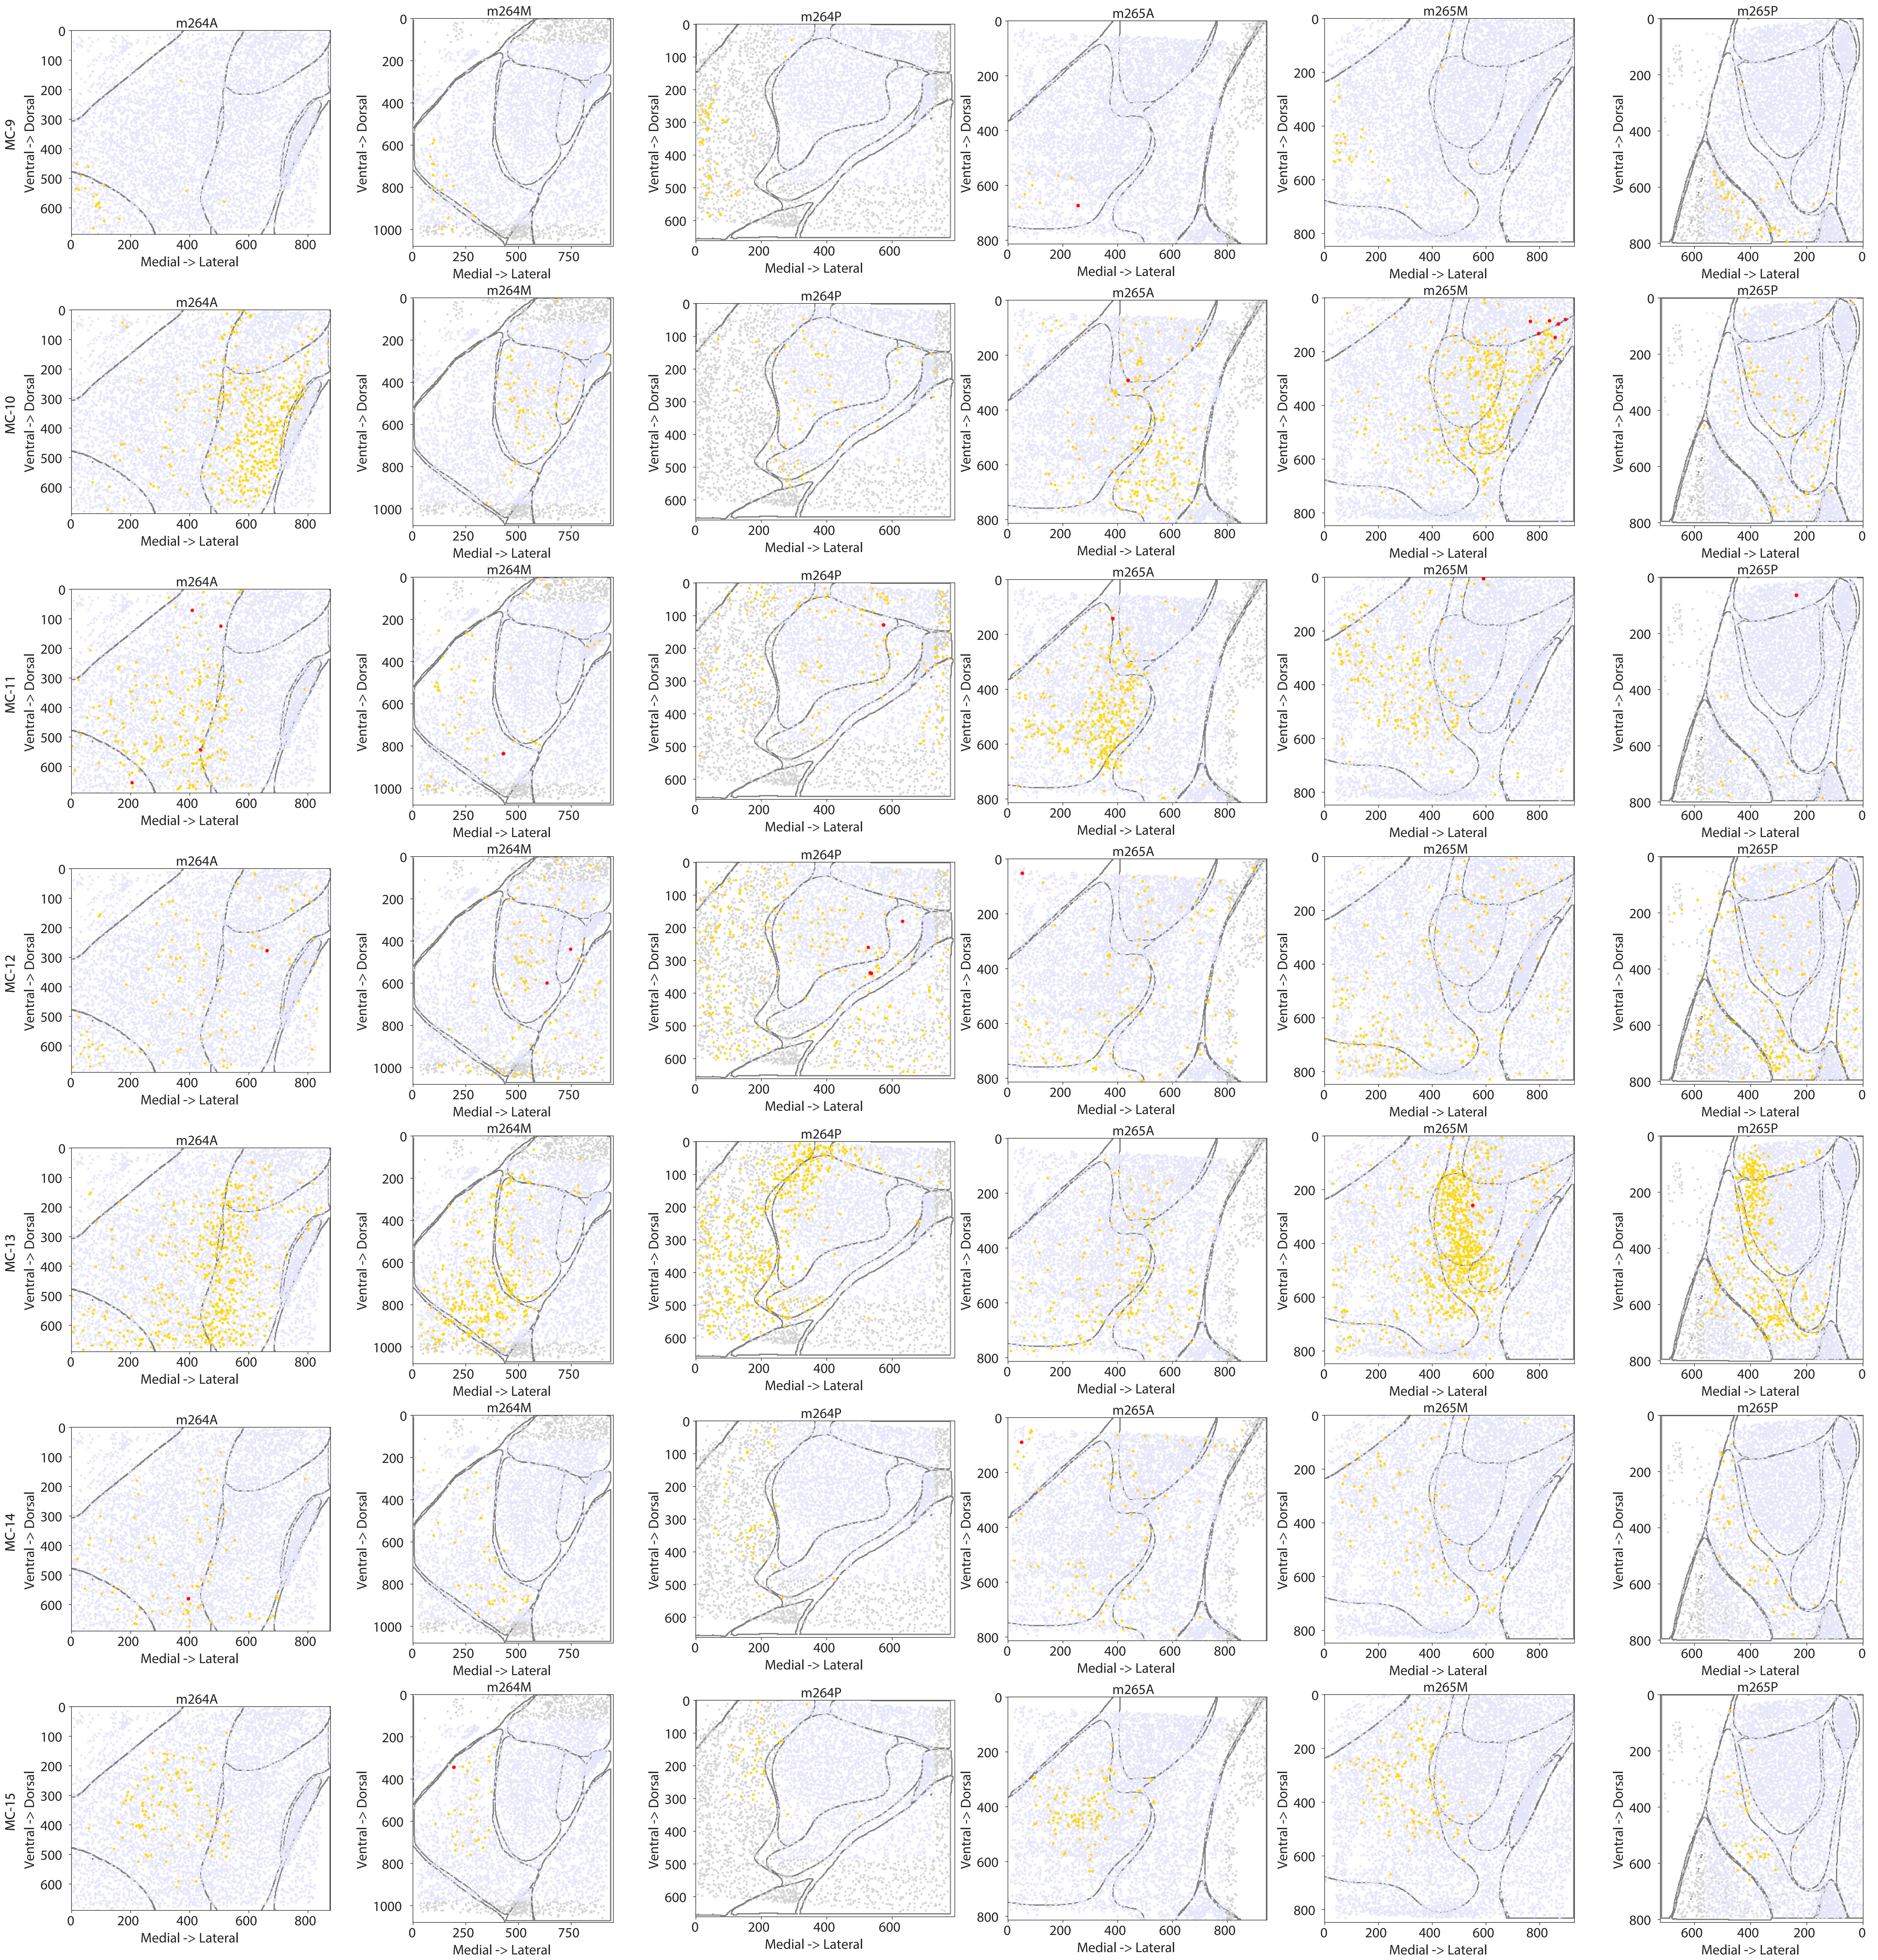

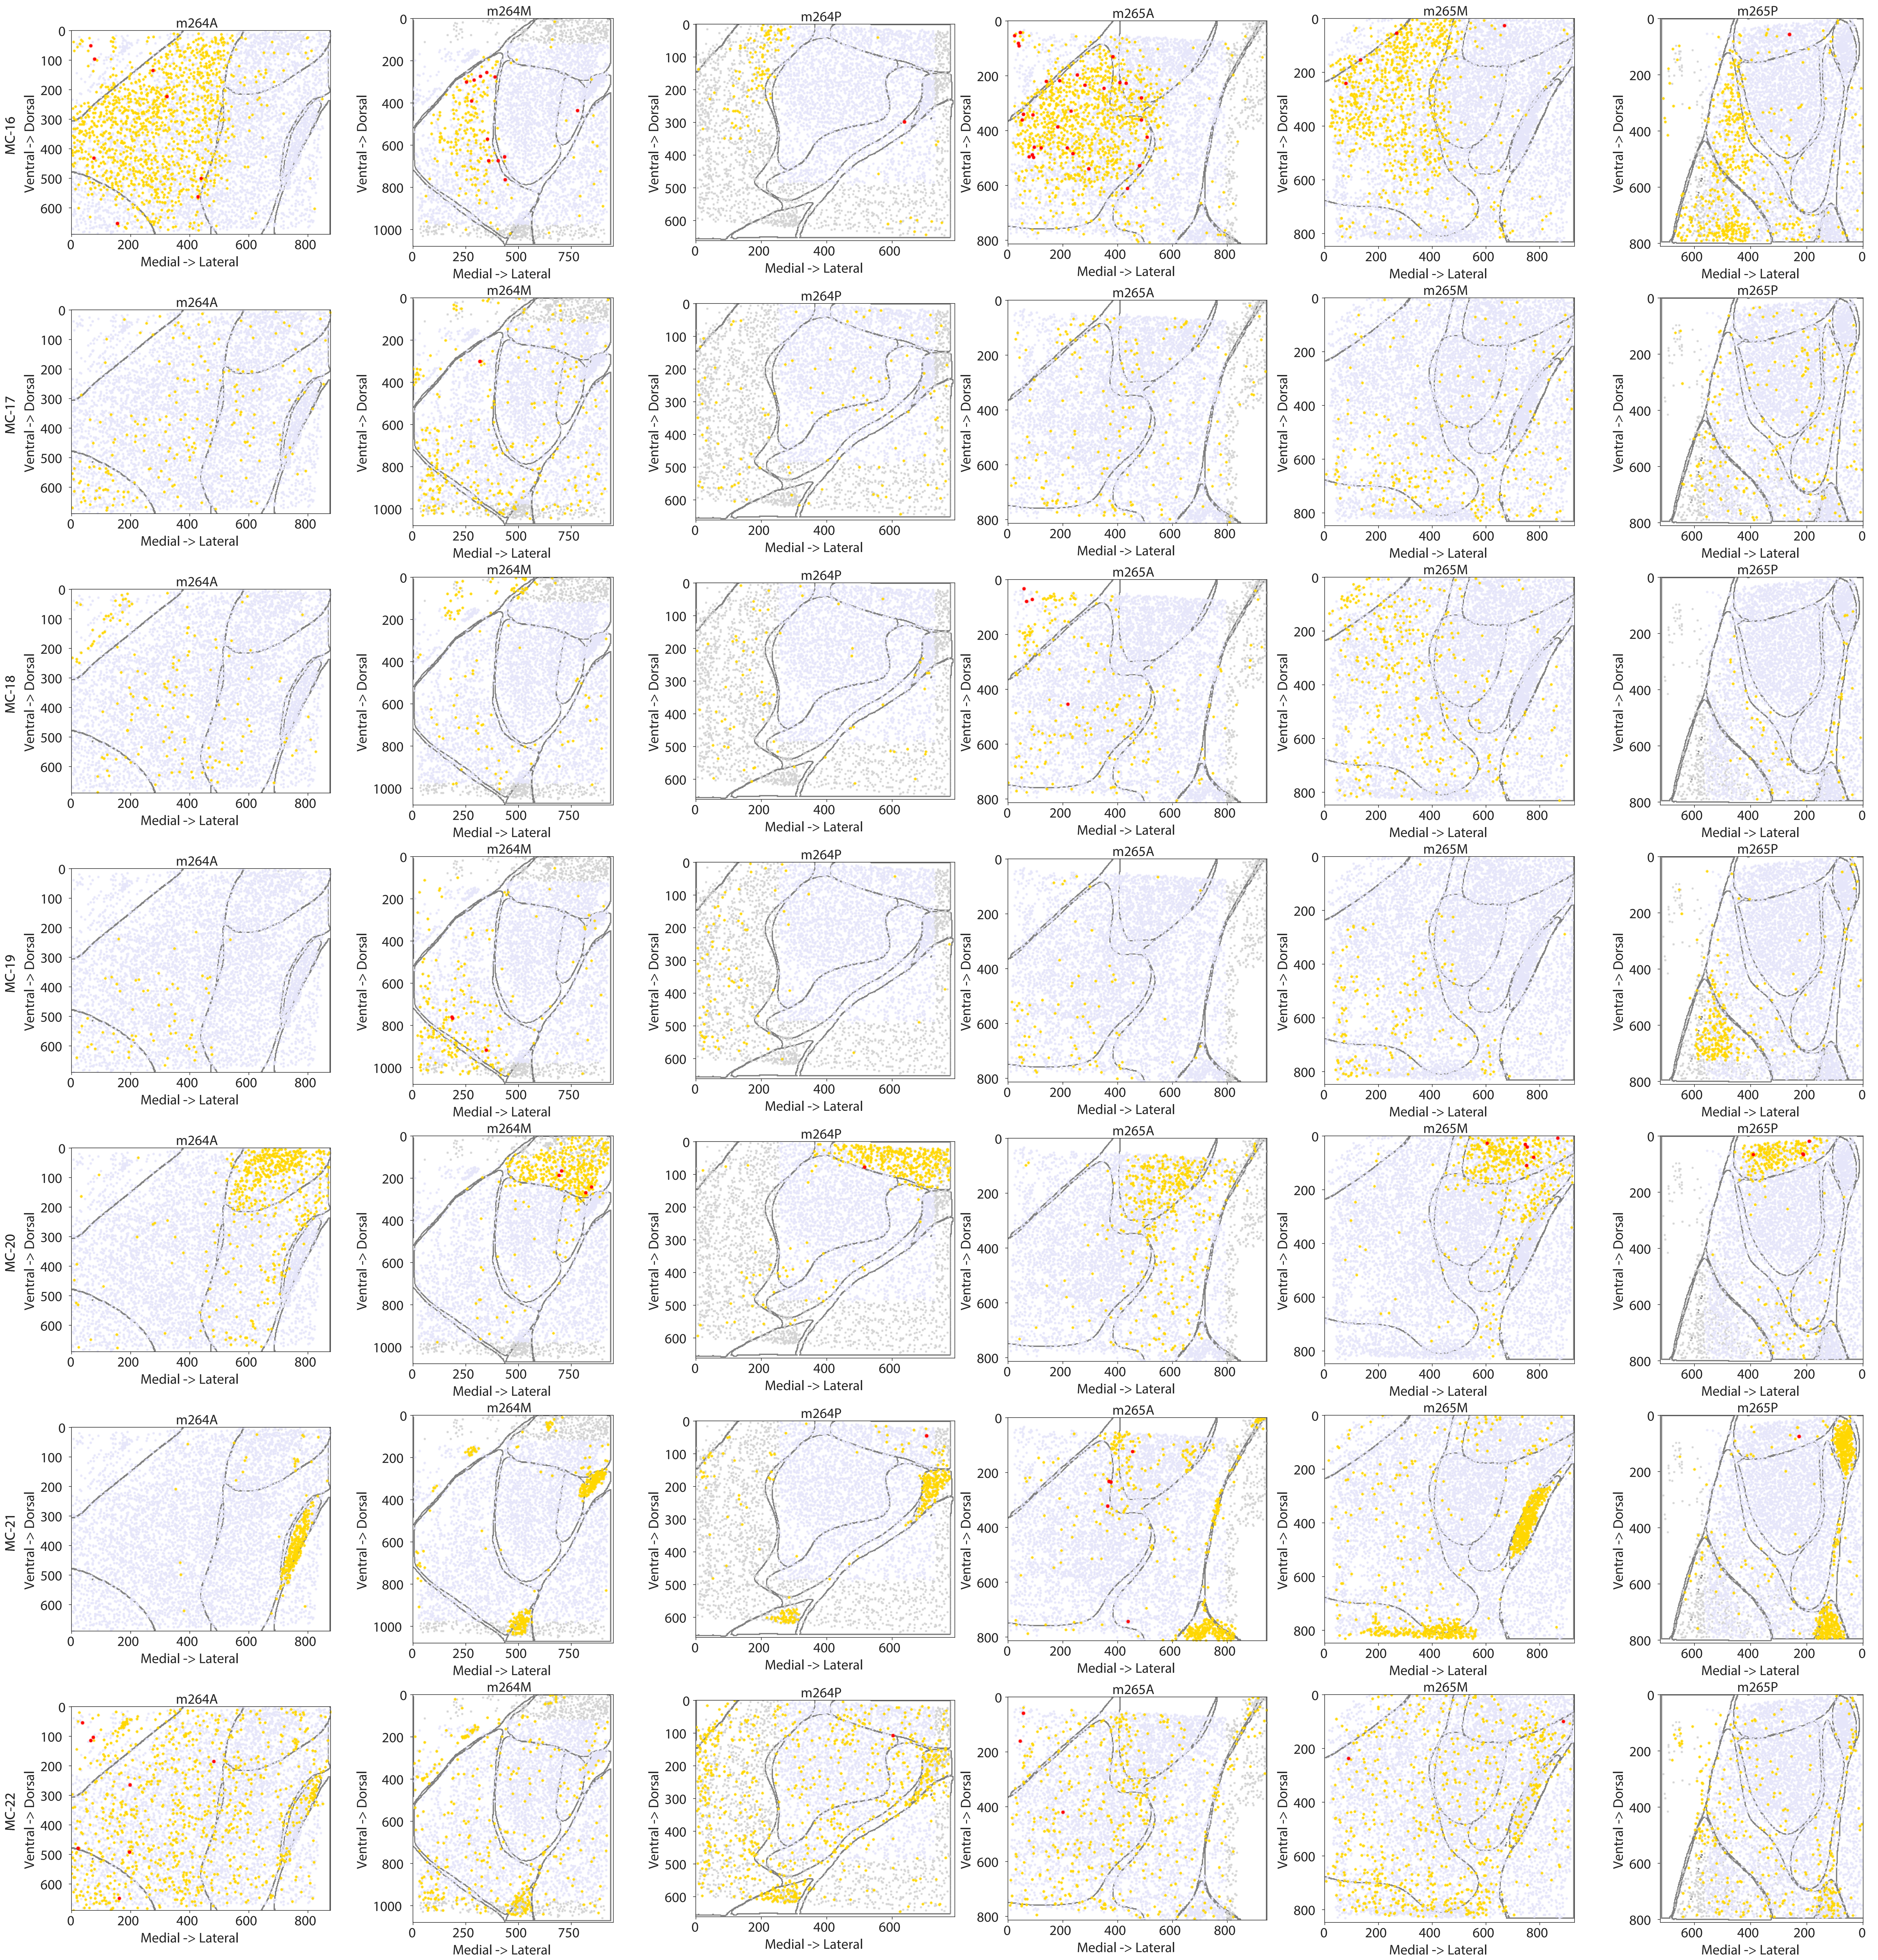

Supplement: fig5-data2 [file elife-84262-fig5-data2-v2.pdf]
