# Supplementary material for: Multimodal mapping of cell types and projections in the central nucleus of the amygdala
Source: eLife. 2023 Jan 20;12:e84262. doi: 10.7554/eLife.84262 (PMC9977318; doi:10.7554/eLife.84262)
Supplement: Figure 3—figure supplement 1—source data 1. [file elife-84262-fig3-figsupp1-data1.xlsx]

## Sheet: Sheet1
EASI-FISH cluster	scRNAseq cluster	Selected marker genes	Distribution
MC-1	seq-c2	Nefm, Tac2, Htr1b, Ebf1, Npy1r, Penk, Oprk1	CeM
MC-2	seq-c7	Pdyn, Sst, Vipr2, Nts, Crh, Tac2, Vgf, Ppp1r1b, Crym, Ebf1	CeL
MC-3	seq-c10	Pdyn, Sst, Ppp1r1b, Crym, Ebf1	CeL and CeC
MC-4	seq-c7	Nts, Vgf	CeM (rare cell type)
MC-5	seq-c5	Drd2, Scn4b, Ppp1r1b, Crym, Cyp26b1, Penk	AST, CeC
MC-6	seq-c8	Prkcd, Cartpt, Penk, Vgf, Ppp1r1b	CeL and CeC
MC-7	AST cluster	Drd1, Ppp1r1b, Crym, Penk	AST
MC-8	BLA cluster	Oprk1, Npy1r, Vgf, Crym, Cyp26b1	BLA
MC-9	seq-c3	Gpx3, Gal	CeM (small cluster)
MC-10	seq-c6	Cyp26b1, Penk, Crym	CeL and CeC (enriched in anterior)
MC-11	seq-c11	Sema3c, Sst, Tac1	CeM
MC-12	seq-c10	Sst, Vgf	scattered
MC-13	seq-c13	Penk, Dlk1, Cyp26b1	mostly CeM
MC-14	seq-c5	Drd2, Scn4b, Nefm, Crym	CeM
MC-15	seq-c9	Vdr, Npy1r	CeM
MC-16	seq-c2, seq-c4	Nefm, Htr1b, Ebf1	CeM
MC-17	seq-c12	Vgf	scattered
MC-18	seq-c11	Sema3c, Nefm	CeM
MC-19	seq-c3	Gpx3, Ebf1	CeM
MC-20	AST cluster	Drd2, Penk, Ppp1r1b, Crym	AST
MC-21	ITCs	Drd1, Penk	ITC
MC-22	unclassified	--	scattered
