# Supplementary material for: Multimodal mapping of cell types and projections in the central nucleus of the amygdala
Source: eLife. 2023 Jan 20;12:e84262. doi: 10.7554/eLife.84262 (PMC9977318; doi:10.7554/eLife.84262)
Supplement: Supplementary file 1. — Gene names are listed in the first column, and molecular clusters in the last column. avg_logFC: log fold-chage of the average expression between cells in the cluster of interest and all other cells; pct.1: the percentage of cells where the feature is detected in the cluster of interest; pct.2: the percentage of cells where the feature is detected in all other cells; p_val_adj: adjusted p-value is based on the Bonferroni correction. [file elife-84262-supp1.xlsx]

## Sheet: File1_scRNASeq_DE_genes
gene name	p_val	avg_log2FC	pct.1	pct.2	p_val_adj	cluster
Txn1	3.34e-76	0.782534	0.45	0.034	1.11e-71	1
H2afz	1.6e-75	1.7878	0.656	0.109	5.33e-71	1
Pgam1	2.09e-73	1.70409	0.939	0.324	6.96e-69	1
Bsg	4.31e-73	1.1575	0.861	0.218	1.44e-68	1
Pkm	1.83e-70	1.67663	0.956	0.334	6.1e-66	1
Rpl14	1.14e-68	1.18004	0.722	0.153	3.81e-64	1
Rps11	1.32e-67	0.927967	0.544	0.075	4.4e-63	1
Eif5a	1.87e-66	1.15287	0.9	0.261	6.24e-62	1
Tpi1	2.13e-65	1.71887	0.878	0.271	7.12e-61	1
Hnrnpa1	5.64e-65	1.08772	0.733	0.164	1.88e-60	1
Rps3	2.48e-64	1.28981	0.589	0.094	8.28e-60	1
Ly6e	7.26e-64	1.08431	0.561	0.092	2.42e-59	1
Ldha	8.77e-63	1.535	0.45	0.049	2.93e-58	1
Tubb5	9.09e-63	1.56106	0.856	0.257	3.03e-58	1
Gapdh	6.7e-62	1.28763	0.972	0.352	2.24e-57	1
Gstp1	2.79e-60	0.761922	0.944	0.35	9.3e-56	1
Tpt1	7.1e-60	1.02679	0.617	0.118	2.37e-55	1
Mif	7.64e-60	0.964259	0.778	0.193	2.55e-55	1
Rpl19	8.29e-60	0.921157	0.672	0.14	2.77e-55	1
H3f3b	8.86e-60	1.35752	0.5	0.071	2.96e-55	1
Cox8a	1.21e-59	1.27304	1	0.586	4.05e-55	1
Eef1a1	4.16e-59	1.40705	0.617	0.114	1.39e-54	1
Gpi1	4.68e-58	1.25715	0.922	0.339	1.56e-53	1
Rpl8	5.16e-58	1.47031	0.394	0.039	1.72e-53	1
Ppia	6.56e-58	1.28617	1	0.565	2.19e-53	1
Actg1	8.5e-58	1.45566	0.983	0.453	2.84e-53	1
Tuba1b	5.84e-57	1.40676	0.972	0.398	1.95e-52	1
Ppp1ca	2.17e-56	1.13441	0.817	0.245	7.24e-52	1
Actb	7.19e-56	1.43777	0.778	0.198	2.4e-51	1
Ranbp1	1.07e-55	1.25642	0.8	0.247	3.56e-51	1
Rpl4	4.08e-54	1.06597	0.511	0.082	1.36e-49	1
Eef1g	7.35e-52	0.775598	0.8	0.249	2.45e-47	1
Pgk1	2.37e-51	0.893635	0.472	0.073	7.92e-47	1
Ctsd	6.96e-50	1.00827	0.717	0.192	2.32e-45	1
Cox4i1	1.35e-49	1.19647	0.994	0.639	4.5e-45	1
Oaz1	9.11e-49	1.29115	0.95	0.404	3.04e-44	1
Hsp90b1	1.53e-48	1.1727	0.733	0.214	5.11e-44	1
Myl6	4.13e-48	0.944361	0.883	0.308	1.38e-43	1
Rplp1	1.4e-47	0.78633	0.611	0.138	4.69e-43	1
Aldoa	2.04e-47	1.22784	0.994	0.519	6.81e-43	1
Ctsb	2.6e-47	1.23246	0.894	0.385	8.69e-43	1
Rps3a1	9.94e-47	0.799451	0.6	0.145	3.32e-42	1
Ran	6.02e-46	1.1208	0.822	0.295	2.01e-41	1
Npm1	2.88e-45	0.801748	0.506	0.098	9.62e-41	1
Naca	1.23e-43	0.920647	0.778	0.263	4.12e-39	1
Eef1b2	1.7e-42	0.926434	0.678	0.2	5.69e-38	1
Rbm3	3.42e-42	0.782784	0.544	0.124	1.14e-37	1
Pfdn5	4.44e-42	1.08143	0.944	0.464	1.48e-37	1
Cct5	5.6e-42	0.865788	0.739	0.237	1.87e-37	1
Hspa5	9.8e-42	0.905337	0.767	0.251	3.27e-37	1
Syt2	2.97e-48	1.03724	0.562	0.074	9.93e-44	2
Cadps2	2.22e-39	1.80851	0.812	0.239	7.42e-35	2
Nefm	2.95e-37	1.87716	1	0.612	9.86e-33	2
Tac2	1.54e-31	3.12424	0.8	0.298	5.13e-27	2
Npas1	1e-26	1.04441	0.312	0.04	3.34e-22	2
Nr2f1	6.84e-26	1.00133	0.863	0.305	2.28e-21	2
Col25a1	7.66e-25	1.1876	0.9	0.395	2.56e-20	2
Ebf1	8.1e-25	1.16871	0.875	0.491	2.7e-20	2
Ar	8.76e-22	1.14547	0.887	0.47	2.92e-17	2
Cdh13	8.98e-22	1.37177	0.925	0.541	3e-17	2
Gpr101	3.52e-21	0.841689	0.875	0.37	1.18e-16	2
Aldoc	3.64e-21	1.28519	0.925	0.491	1.22e-16	2
Vamp1	7.44e-20	1.05418	0.938	0.552	2.48e-15	2
Ptpru	1.09e-19	0.885795	0.65	0.237	3.63e-15	2
Napb	1.3e-19	0.96642	1	0.906	4.33e-15	2
Prlr	1.66e-19	0.872727	0.762	0.297	5.54e-15	2
Syn2	2.23e-19	0.850219	1	0.967	7.44e-15	2
Nefl	1.64e-18	0.946997	1	0.747	5.46e-14	2
Mfsd4a	4.68e-18	0.825934	0.825	0.37	1.56e-13	2
Calb2	1.6e-17	0.892977	0.637	0.234	5.33e-13	2
Efhd2	4.11e-17	0.824643	0.9	0.485	1.37e-12	2
Elavl2	6.56e-17	0.787138	0.838	0.382	2.19e-12	2
Gnas	1.09e-16	0.887182	1	0.899	3.64e-12	2
Htr1b	1.1e-16	0.780317	0.613	0.214	3.66e-12	2
Isl1	1.73e-16	0.795993	0.662	0.252	5.78e-12	2
Arhgdig	1.25e-15	0.823424	0.975	0.66	4.17e-11	2
Pcdh17	2.03e-14	0.849328	0.95	0.666	6.78e-10	2
Spock1	7.03e-14	0.758693	0.975	0.644	2.35e-09	2
Fkbp2	8.02e-14	0.821059	0.988	0.779	2.68e-09	2
Rab27b	1.51e-13	0.774025	0.887	0.485	5.04e-09	2
Alcam	2.48e-13	0.834726	0.887	0.505	8.29e-09	2
Pnoc	1.83e-11	0.845672	0.662	0.321	6.09e-07	2
Pcdh9	3.29e-11	0.80407	0.912	0.708	1.1e-06	2
mt-Rnr2	3.57e-11	1.17484	0.838	0.558	1.19e-06	2
Gm42418	1.51e-08	1.27397	0.775	0.57	0.00050366	2
mt-Rnr1	7.03e-06	1.02212	0.762	0.583	0.234628	2
Syt17	7.8e-44	0.864254	0.533	0.031	2.6e-39	3
H2-Q2	6.83e-37	1.11664	0.6	0.048	2.28e-32	3
Pcbd1	2.41e-34	1.93143	0.8	0.104	8.03e-30	3
Gdpd2	1.72e-25	1.42384	0.7	0.109	5.72e-21	3
Cbln2	2e-24	2.752	0.733	0.135	6.68e-20	3
Gal	4.4e-23	7.85382	0.767	0.171	1.47e-18	3
Gpx3	1.76e-22	2.60528	0.933	0.304	5.89e-18	3
Id2	1.18e-19	0.948151	0.333	0.029	3.94e-15	3
Avp	1.03e-18	6.12755	0.533	0.089	3.44e-14	3
Cpa2	8.71e-18	0.881877	0.467	0.065	2.91e-13	3
Parm1	3.76e-16	1.63177	0.867	0.272	1.26e-11	3
Resp18	4.27e-15	1.46307	1	0.899	1.43e-10	3
Fhad1	6.87e-14	0.972186	0.467	0.084	2.29e-09	3
Igsf1	8.79e-14	0.791559	0.533	0.109	2.93e-09	3
Gabrq	1.98e-13	1.17494	0.733	0.218	6.6e-09	3
Ecel1	5.73e-13	2.30104	0.867	0.531	1.91e-08	3
Calb2	1.72e-12	2.0083	0.733	0.247	5.74e-08	3
Dgkk	2.21e-12	0.973974	0.767	0.241	7.38e-08	3
Nr2f2	4e-12	1.42265	0.667	0.2	1.34e-07	3
Tmem145	9.47e-12	0.7784	0.833	0.337	3.16e-07	3
Fbxo2	6.72e-11	1.0819	0.767	0.306	2.24e-06	3
Rgs10	1.05e-10	1.53965	0.867	0.438	3.5e-06	3
Nenf	1.05e-10	1.38157	0.933	0.74	3.51e-06	3
Gm1673	4.87e-10	1.46911	1	0.891	1.62e-05	3
A230065H16Rik	6.79e-10	1.06968	0.533	0.14	2.27e-05	3
Gpc3	1.01e-09	1.18518	0.533	0.146	3.36e-05	3
Stmn2	1.36e-09	1.0952	1	0.795	4.53e-05	3
Pnoc	1.53e-09	1.5047	0.767	0.331	5.09e-05	3
Slc5a5	1.53e-09	1.09355	0.833	0.402	5.11e-05	3
Ly6h	1.81e-09	0.949621	1	0.995	6.05e-05	3
Col25a1	2.19e-09	1.23985	0.867	0.415	7.31e-05	3
Ctbp2	2.85e-09	0.866562	0.733	0.264	9.52e-05	3
Lgi3	3.54e-09	0.950379	0.733	0.266	0.000118048	3
Tecr	3.98e-09	1.04873	1	0.944	0.000132689	3
Shisa4	4.4e-09	0.775878	0.833	0.366	0.00014691	3
Sccpdh	1.38e-08	1.04521	0.833	0.42	0.000459179	3
Luzp2	1.59e-08	0.928173	0.633	0.222	0.000530392	3
Slc38a1	1.77e-08	1.39077	0.9	0.618	0.000590547	3
Arhgap36	2.33e-08	1.18448	0.567	0.18	0.000776628	3
Tmem130	3.54e-08	0.75161	1	0.995	0.00117994	3
Ache	7.09e-08	0.786815	0.967	0.768	0.00236571	3
Fkbp2	1.97e-07	1.05623	1	0.787	0.00658379	3
Pcdh10	3.78e-07	0.958658	0.833	0.453	0.0126302	3
Tenm2	4.2e-07	0.799584	0.933	0.505	0.0140029	3
Hpcal1	4.89e-07	0.950725	0.933	0.719	0.016323	3
Coprs	5.69e-07	0.82418	0.867	0.509	0.0189876	3
Pcp4	6.66e-07	1.09922	0.933	0.648	0.0222188	3
Fxyd6	1.05e-06	0.765807	0.967	0.66	0.0351846	3
Fabp5	1.17e-06	0.950267	0.7	0.316	0.0390787	3
Cib2	1.36e-06	0.83567	0.867	0.439	0.0453144	3
Tuba1b	3.62e-61	1.49102	0.923	0.393	1.21e-56	4
Tmsb10	2.05e-41	0.770642	0.942	0.464	6.83e-37	4
Ppia	3.65e-39	0.990396	0.981	0.558	1.22e-34	4
Cfl1	1.16e-26	0.764852	0.909	0.545	3.89e-22	4
Slc25a3	2.41e-23	0.769834	0.923	0.652	8.05e-19	4
Tubb5	1.72e-20	0.990976	0.601	0.288	5.75e-16	4
Marcksl1	3.86e-16	0.754507	0.659	0.385	1.29e-11	4
Scn4b	1.61e-99	1.48041	0.741	0.04	5.38e-95	5
Ido1	4.17e-92	1.14452	0.534	0.016	1.39e-87	5
Cd4	1.34e-85	0.788526	0.621	0.03	4.48e-81	5
Adora2a	1.07e-80	1.1214	0.966	0.121	3.58e-76	5
Nexn	5.82e-74	1.59062	0.69	0.052	1.94e-69	5
Drd2	5.51e-69	1.22041	0.845	0.097	1.84e-64	5
Ccnd1	1.93e-64	1.17492	0.552	0.034	6.44e-60	5
Upb1	2.78e-61	1.07181	0.569	0.041	9.26e-57	5
Inf2	3.55e-53	1.17351	0.759	0.097	1.18e-48	5
Lpl	2.68e-49	0.936374	0.552	0.05	8.93e-45	5
Foxp1	1.64e-46	1.95757	0.931	0.217	5.48e-42	5
Lrrc10b	2.01e-43	1.04202	0.552	0.059	6.69e-39	5
Gpr6	8.64e-42	1.32566	0.603	0.078	2.88e-37	5
A830036E02Rik	1.06e-41	0.835615	0.603	0.075	3.52e-37	5
Gabrd	9.86e-40	1.43713	0.862	0.183	3.29e-35	5
Ppp1r1b	4.77e-39	2.65101	1	0.487	1.59e-34	5
Hist1h2bc	2.13e-34	1.35008	0.793	0.167	7.12e-30	5
Pde1b	3.36e-34	1.94383	1	0.662	1.12e-29	5
Ckb	2.87e-33	1.65219	1	0.993	9.58e-29	5
Gucy1a3	1.3e-32	1.64024	0.759	0.176	4.34e-28	5
Rgs12	1.28e-31	0.84043	0.448	0.053	4.27e-27	5
Malat1	8.42e-31	1.37068	1	0.945	2.81e-26	5
Hpca	4.21e-30	1.6299	1	0.963	1.41e-25	5
Phactr1	5.82e-30	1.77714	1	0.858	1.94e-25	5
Pde10a	9.46e-29	2.10751	0.931	0.471	3.16e-24	5
Penk	1.27e-28	2.72868	0.983	0.763	4.25e-24	5
Arpp21	1.54e-28	1.99439	1	0.748	5.15e-24	5
Tmod1	1.75e-28	1.00004	0.672	0.154	5.84e-24	5
Arpp19	1.93e-28	2.42891	0.948	0.612	6.43e-24	5
Gpm6b	2.29e-27	1.51838	0.966	0.509	7.64e-23	5
Prkcb	3.33e-27	1.76648	0.983	0.804	1.11e-22	5
Ppp3ca	9.82e-27	1.57537	1	0.975	3.28e-22	5
Gm12892	1.24e-26	0.86804	0.983	0.846	4.15e-22	5
Ngef	6.27e-26	1.6476	1	0.796	2.09e-21	5
Ankrd33b	1.47e-25	0.809509	0.448	0.067	4.92e-21	5
Ramp1	2.2e-25	1.59608	1	0.584	7.34e-21	5
Rasgrp1	2.6e-25	1.20609	0.966	0.391	8.67e-21	5
Gnal	5.52e-24	1.40394	1	0.753	1.84e-19	5
Adcy5	1.15e-23	1.48716	0.966	0.601	3.85e-19	5
Strip2	1.71e-23	0.923746	0.793	0.225	5.69e-19	5
Rgs7bp	1.77e-23	1.56251	0.966	0.867	5.91e-19	5
Tesc	2.4e-23	1.30883	1	0.67	8.02e-19	5
Diras2	4.7e-23	1.32661	0.897	0.351	1.57e-18	5
Mctp1	9.92e-23	1.30597	0.879	0.345	3.31e-18	5
Prkch	1.2e-22	0.837856	0.517	0.107	4e-18	5
Pcsk2	1.89e-22	1.27139	0.948	0.458	6.31e-18	5
Plppr4	3.79e-22	1.26371	1	0.885	1.26e-17	5
Pdzd2	1.01e-21	0.943521	0.724	0.231	3.38e-17	5
Ccdc88c	2.1e-21	1.1215	0.793	0.252	7e-17	5
Ppp1r2	4e-21	1.65964	0.948	0.578	1.34e-16	5
Ppp1r1b	5.68e-43	1.65076	0.991	0.469	1.9e-38	6
Penk	7.24e-39	1.89632	1	0.754	2.42e-34	6
Ramp1	1.68e-35	1.37456	0.981	0.57	5.6e-31	6
Cyp26b1	1.62e-32	1.17097	0.792	0.257	5.42e-28	6
Crym	2.57e-31	0.925247	0.698	0.193	8.58e-27	6
Ncdn	2.9e-31	1.04464	1	0.989	9.67e-27	6
Sec14l1	4.05e-31	1.16902	0.915	0.428	1.35e-26	6
Ppp1r2	6.84e-31	1.55066	0.934	0.566	2.28e-26	6
Ddn	1.52e-30	1.14311	0.943	0.531	5.06e-26	6
Cck	6.88e-28	1.47339	0.66	0.221	2.3e-23	6
Ptk2b	4.15e-26	1.09033	0.981	0.733	1.38e-21	6
Ano3	3.36e-25	1.00067	0.755	0.302	1.12e-20	6
Gabrd	5.44e-25	0.821988	0.594	0.179	1.81e-20	6
Plppr4	2.41e-24	1.00219	1	0.881	8.05e-20	6
Baiap2	2.14e-23	1.01777	0.981	0.859	7.16e-19	6
Gng7	5.78e-23	0.750566	0.906	0.526	1.93e-18	6
Wfs1	2.48e-22	1.00591	0.991	0.79	8.27e-18	6
Arpp21	4.26e-22	1.12407	0.981	0.74	1.42e-17	6
Rgs14	4.87e-22	0.893911	0.849	0.475	1.63e-17	6
Upk1b	4.8e-21	0.832088	0.651	0.243	1.6e-16	6
Tesc	2.84e-20	0.849809	0.943	0.663	9.49e-16	6
Map2k1	1.24e-19	0.811449	0.991	0.911	4.13e-15	6
Kcnh3	1.66e-19	0.7917	0.745	0.334	5.55e-15	6
Spg21	5.57e-19	0.944853	0.821	0.437	1.86e-14	6
Ccdc88c	1.16e-18	0.896544	0.604	0.248	3.88e-14	6
Kctd1	4.53e-18	0.779899	0.887	0.551	1.51e-13	6
R3hdm4	3.67e-17	0.785771	0.953	0.702	1.22e-12	6
Slc25a5	3.71e-17	1.03373	0.708	0.342	1.24e-12	6
Rasgrp1	3.87e-17	0.768631	0.755	0.387	1.29e-12	6
Rab40b	4.16e-17	0.750828	0.745	0.368	1.39e-12	6
Ccnd2	5.61e-17	0.835569	0.415	0.12	1.87e-12	6
Nhp2	3.7e-16	1.28967	0.604	0.28	1.23e-11	6
Cnksr2	1.36e-15	0.881872	0.906	0.713	4.54e-11	6
Cnih3	5.79e-15	0.88932	0.858	0.588	1.93e-10	6
Prkcd	1.42e-14	0.88346	0.491	0.171	4.74e-10	6
Mrps6	4.17e-14	0.858638	0.802	0.492	1.39e-09	6
Hpca	1.01e-13	0.778281	1	0.962	3.37e-09	6
6430590A07Rik	2.45e-13	0.909239	0.547	0.261	8.18e-09	6
Gsta4	2.57e-13	0.940465	0.764	0.493	8.59e-09	6
Rgs4	1.66e-12	0.772646	0.934	0.782	5.53e-08	6
Arpp19	4.28e-12	0.773279	0.868	0.606	1.43e-07	6
Ddx5	8.37e-12	0.800209	0.792	0.536	2.79e-07	6
Gadd45g	3.12e-08	0.847442	0.755	0.545	0.00104126	6
Rbp1	4.15e-92	1.44768	0.641	0.02	1.38e-87	7
Vipr2	1.03e-91	1.60655	0.692	0.026	3.43e-87	7
Crh	1.01e-89	3.55333	0.897	0.054	3.38e-85	7
Wfdc18	3.16e-80	1.80329	0.795	0.046	1.05e-75	7
Npbwr1	5.74e-60	1.09743	0.59	0.032	1.92e-55	7
Jam2	2.01e-54	0.954511	0.641	0.045	6.69e-50	7
Spink8	1.04e-48	3.23956	1	0.184	3.47e-44	7
Car8	1.22e-41	2.01417	0.641	0.065	4.08e-37	7
Nts	1.17e-39	4.08669	0.949	0.208	3.89e-35	7
Dnah5	2.26e-38	1.35979	0.769	0.109	7.54e-34	7
Tox	1.51e-36	0.957417	0.641	0.072	5.02e-32	7
Arhgap36	4.88e-36	2.4048	0.897	0.168	1.63e-31	7
Mcub	1.15e-31	0.897861	0.41	0.032	3.84e-27	7
Tac2	1.08e-27	3.0173	0.949	0.309	3.62e-23	7
Itga4	1.96e-27	0.803696	0.436	0.044	6.56e-23	7
Pdyn	4.49e-26	3.04053	0.974	0.375	1.5e-21	7
Eepd1	1.03e-22	1.67817	0.949	0.31	3.45e-18	7
Crym	1.06e-22	1.67192	0.821	0.215	3.52e-18	7
Fkbp1a	2.5e-22	1.7391	1	0.929	8.35e-18	7
Ptpdc1	2.35e-21	1.37136	0.872	0.273	7.83e-17	7
Hist1h2bc	4.3e-21	1.15114	0.744	0.177	1.43e-16	7
Spata13	6.19e-20	1.10259	0.923	0.278	2.07e-15	7
Rexo2	6.79e-20	1.84131	0.923	0.468	2.27e-15	7
Ncdn	9.73e-20	1.8922	1	0.99	3.25e-15	7
Gpr150	5.16e-19	1.12855	0.872	0.276	1.72e-14	7
Sec14l1	8.81e-19	1.6953	0.949	0.451	2.94e-14	7
Wfs1	1.81e-18	1.75651	1	0.8	6.04e-14	7
Rab40b	3.42e-18	1.41447	0.949	0.38	1.14e-13	7
Pdzd2	3.79e-18	0.923084	0.795	0.236	1.26e-13	7
Sox8	3.28e-17	1.07751	0.821	0.266	1.09e-12	7
Ptk2b	7.91e-17	1.41806	1	0.745	2.64e-12	7
Arl4a	8.37e-17	1.83303	0.949	0.485	2.79e-12	7
Itm2c	1.31e-16	1.25798	1	0.99	4.38e-12	7
Gmpr	6.93e-16	1.39382	0.974	0.614	2.31e-11	7
Klf5	1.02e-15	1.14961	0.769	0.227	3.39e-11	7
Etv5	3.29e-15	1.13886	0.821	0.294	1.1e-10	7
Ppp1r1b	1.16e-14	1.26237	1	0.494	3.87e-10	7
Crip2	1.29e-14	1.32428	1	0.804	4.31e-10	7
Sst	1.39e-14	2.20682	0.821	0.352	4.65e-10	7
Gnb4	1.46e-14	1.27721	0.821	0.335	4.88e-10	7
Nmb	1.62e-14	1.68067	0.487	0.112	5.4e-10	7
Igsf1	5.97e-14	1.23307	0.487	0.108	1.99e-09	7
Rap1gap	1.31e-13	1.37201	0.974	0.917	4.37e-09	7
Filip1	2.2e-13	1.03081	0.641	0.189	7.34e-09	7
Slc1a2	3.33e-13	1.32208	0.872	0.413	1.11e-08	7
Prkca	5.59e-13	0.806263	0.641	0.199	1.86e-08	7
Chga	8.77e-13	1.56073	1	0.912	2.93e-08	7
Fras1	9.38e-13	0.865244	0.718	0.233	3.13e-08	7
Tmsb4x	1.32e-12	1.39661	0.897	0.618	4.41e-08	7
Syndig1l	1.34e-12	0.828789	0.795	0.349	4.48e-08	7
Prkcd	1.62e-148	3.52578	0.978	0.111	5.41e-144	8
Ezr	1.76e-104	1.48224	0.615	0.042	5.87e-100	8
Cartpt	1.09e-89	3.98082	0.859	0.182	3.65e-85	8
Ifi27	9.42e-68	1.1482	0.593	0.079	3.14e-63	8
Itm2c	5.94e-66	1.74959	1	0.99	1.98e-61	8
Ncdn	1.31e-65	2.18255	1	0.989	4.38e-61	8
Spg21	8.87e-57	1.93919	0.941	0.415	2.96e-52	8
Gpr150	3.66e-56	1.40291	0.822	0.236	1.22e-51	8
Nnat	5.6e-56	1.92774	0.993	0.866	1.87e-51	8
Rap1gap	1.38e-54	1.88734	0.993	0.91	4.62e-50	8
Eepd1	3.39e-52	1.72996	0.815	0.276	1.13e-47	8
Chodl	7.42e-52	1.60909	0.748	0.197	2.48e-47	8
Sox2	2.24e-46	1.19365	0.696	0.176	7.47e-42	8
Sox5	2.99e-46	0.964122	0.681	0.165	9.98e-42	8
Pea15a	4.09e-45	1.28858	1	0.912	1.37e-40	8
Mfsd2a	6.6e-44	0.814388	0.341	0.035	2.2e-39	8
Bpgm	7.35e-43	1.57492	0.896	0.51	2.45e-38	8
Wfs1	5.7e-41	1.58458	1	0.785	1.9e-36	8
Fkbp1a	1.43e-40	1.15443	0.985	0.925	4.76e-36	8
Gm19410	4.01e-40	1.07592	0.637	0.167	1.34e-35	8
Strip2	9.03e-39	1.22448	0.674	0.203	3.01e-34	8
Atp6ap2	1.56e-38	1.29044	0.985	0.886	5.22e-34	8
Klf5	6.94e-38	1.0227	0.659	0.198	2.32e-33	8
Hpcal4	4.54e-37	1.17962	0.985	0.926	1.51e-32	8
Sec14l1	1.49e-35	1.26641	0.881	0.421	4.98e-31	8
Cpne7	2.89e-35	1.03358	0.993	0.828	9.63e-31	8
Spata13	6.91e-35	0.905046	0.733	0.25	2.31e-30	8
Bcl2	7.3e-35	1.05929	0.704	0.259	2.44e-30	8
Etv5	9.87e-35	1.08397	0.733	0.263	3.3e-30	8
Rps6ka2	2.09e-34	1.24778	0.926	0.571	6.99e-30	8
Cst3	3.84e-33	2.13278	0.711	0.297	1.28e-28	8
Gpr83	8.18e-32	1.35392	0.793	0.344	2.73e-27	8
Cnih3	5.17e-31	1.04531	0.926	0.575	1.72e-26	8
Tomm34	1.07e-29	1.10869	0.963	0.734	3.58e-25	8
Dtna	1.12e-28	1.21439	0.926	0.682	3.75e-24	8
Dock10	4.65e-28	1.25085	0.933	0.666	1.55e-23	8
Olfm1	5.05e-28	0.979874	0.993	0.911	1.69e-23	8
Cpd	6.72e-27	1.10266	0.637	0.246	2.24e-22	8
Plekhh2	7.09e-27	0.984517	0.415	0.103	2.37e-22	8
Sostdc1	9.37e-27	0.824334	0.289	0.047	3.13e-22	8
Cpne2	5.59e-26	0.899427	0.741	0.35	1.87e-21	8
Camk1g	2.01e-25	0.946006	0.859	0.521	6.69e-21	8
Wwp1	3.04e-25	0.891094	0.652	0.273	1.01e-20	8
Junb	3.15e-25	1.36089	0.696	0.3	1.05e-20	8
Cry1	9.91e-25	0.931252	0.585	0.219	3.31e-20	8
Chga	5e-24	1.45105	0.963	0.909	1.67e-19	8
Rplp1	6.25e-24	1.2485	0.489	0.169	2.09e-19	8
Camk2d	1.65e-23	0.891248	0.978	0.866	5.51e-19	8
Akap9	2.63e-23	0.97127	0.963	0.844	8.76e-19	8
Pop5	2.63e-23	1.14055	0.859	0.614	8.78e-19	8
Vdr	9.24e-116	3.30392	1	0.033	3.08e-111	9
A730018C14Rik	3.99e-68	1.87151	0.808	0.041	1.33e-63	9
BC030867	3.59e-64	0.910808	0.462	0.01	1.2e-59	9
Avpr1a	3.39e-40	1.374	0.615	0.042	1.13e-35	9
Etv1	5.66e-35	1.9468	0.808	0.091	1.89e-30	9
H2-Q2	5.42e-34	1.07277	0.615	0.05	1.81e-29	9
Rasa4	2.55e-33	1.40207	0.538	0.04	8.52e-29	9
Mc4r	4.44e-23	1.68765	0.654	0.091	1.48e-18	9
Pnoc	8.42e-22	2.61555	1	0.328	2.81e-17	9
Grik1	1.74e-21	1.44663	0.654	0.102	5.81e-17	9
Cntnap3	1.69e-20	0.977678	0.654	0.097	5.62e-16	9
Satb1	2.15e-20	1.56654	0.808	0.172	7.17e-16	9
Npy5r	3.71e-19	0.754066	0.577	0.081	1.24e-14	9
Nrip3	8.72e-19	1.5655	0.923	0.243	2.91e-14	9
Npy1r	1.19e-17	1.27166	0.615	0.104	3.98e-13	9
Lypd1	5.45e-17	2.36469	1	0.656	1.82e-12	9
Gpr6	9.78e-17	1.00071	0.577	0.091	3.26e-12	9
Rab3b	3.49e-16	1.2827	0.808	0.192	1.16e-11	9
Cpne4	7.84e-16	1.39475	0.808	0.201	2.62e-11	9
Tmem178	6.36e-15	0.924904	0.5	0.078	2.12e-10	9
Spock3	8.66e-14	1.76291	0.962	0.597	2.89e-09	9
Maob	5.2e-13	0.916934	0.615	0.123	1.73e-08	9
Unc13c	1.38e-12	1.26042	0.885	0.291	4.6e-08	9
Sparcl1	2.3e-12	1.29014	0.962	0.413	7.66e-08	9
Plpp4	5.89e-12	1.0005	0.577	0.124	1.97e-07	9
Slc7a14	1.05e-11	1.61698	0.962	0.595	3.5e-07	9
Gpx3	1.64e-11	0.949808	0.885	0.307	5.48e-07	9
Tnfrsf21	2.73e-11	1.6194	0.923	0.489	9.12e-07	9
Snap47	7.05e-11	0.861545	1	0.993	2.35e-06	9
Crim1	1.17e-10	1.17117	0.885	0.347	3.92e-06	9
Alcam	1.36e-10	1.58361	0.923	0.519	4.54e-06	9
Vstm2l	2.44e-10	0.766609	0.923	0.456	8.15e-06	9
Kl	4.06e-10	0.896327	0.462	0.098	1.35e-05	9
Pfn2	5.13e-10	0.953251	1	0.987	1.71e-05	9
Cntn1	1.79e-09	1.09467	1	0.911	5.96e-05	9
Ache	4.47e-09	1.12814	0.962	0.769	0.00014918	9
Mpped2	8.77e-09	0.871898	0.923	0.365	0.000292723	9
Tmem130	1.17e-08	0.83384	1	0.995	0.000390215	9
Stmn2	1.77e-08	0.970861	1	0.795	0.000589108	9
Hyi	2.44e-08	0.965744	0.692	0.258	0.000815117	9
Ptchd4	2.5e-08	0.910086	0.538	0.154	0.000835368	9
Rxrg	2.64e-08	0.972215	1	0.504	0.000881194	9
Dpp10	3.07e-08	1.07849	0.923	0.501	0.00102502	9
Magi1	3.72e-08	1.04827	0.885	0.442	0.00124192	9
Gm2694	3.99e-08	0.750876	0.385	0.086	0.00133188	9
Plxdc2	6.02e-08	1.28751	0.769	0.334	0.00200977	9
Fibin	6.91e-08	0.789212	0.462	0.119	0.00230498	9
Nptx1	9.08e-08	1.08662	0.769	0.355	0.00302933	9
Tspyl4	1.46e-07	0.809803	1	0.959	0.00487448	9
Camk2n1	1.53e-07	0.895914	0.962	0.549	0.00509265	9
Mgst1	1.91e-57	0.924432	0.265	0.004	6.37e-53	10
Crym	1e-45	2.34526	0.959	0.205	3.35e-41	10
Cxcl14	3.4e-44	1.70843	0.918	0.177	1.13e-39	10
Sst	2.4e-40	3.75838	1	0.342	8e-36	10
Echdc2	6.32e-38	0.910041	0.347	0.02	2.11e-33	10
Pdyn	9.54e-37	3.34821	1	0.37	3.18e-32	10
Galnt14	1.43e-31	0.794717	0.551	0.074	4.77e-27	10
Snca	5.71e-31	2.0673	1	0.943	1.91e-26	10
Ano2	2.6e-28	0.770594	0.571	0.089	8.69e-24	10
Dlx6os1	1.9e-27	1.22342	0.673	0.135	6.34e-23	10
Galnt18	5.66e-25	1.01813	0.592	0.111	1.89e-20	10
Slc1a2	8.11e-25	1.65219	0.959	0.406	2.71e-20	10
Car8	1.02e-22	0.885797	0.449	0.068	3.41e-18	10
Unc13c	1.21e-22	1.47204	0.857	0.282	4.04e-18	10
Ppp1r1b	1.82e-22	1.62798	1	0.49	6.09e-18	10
Maob	4.82e-22	1.183	0.571	0.116	1.61e-17	10
Syndig1l	9.53e-22	1.04382	0.816	0.345	3.18e-17	10
Arl6ip1	3.24e-21	1.49021	1	0.929	1.08e-16	10
Spink8	4.03e-21	1.55351	0.694	0.189	1.34e-16	10
Cntn4	3.79e-20	0.953239	0.592	0.137	1.26e-15	10
Camk2n1	2.69e-19	1.43134	1	0.541	8.97e-15	10
Ckb	6.08e-19	0.9374	1	0.993	2.03e-14	10
Pcp4	7.56e-19	1.58498	0.98	0.642	2.52e-14	10
Pcsk2	1.6e-18	1.23471	0.98	0.461	5.35e-14	10
Col6a1	2.01e-18	1.00198	0.551	0.124	6.72e-14	10
Ebf1	2.49e-18	1.07894	0.98	0.496	8.32e-14	10
Nrsn1	3.23e-18	1.37348	1	0.747	1.08e-13	10
Arpp21	3.5e-18	1.36721	1	0.75	1.17e-13	10
Dgkb	1.5e-17	1.66752	1	0.727	4.99e-13	10
Pcdh8	1.53e-17	1.54968	0.878	0.42	5.1e-13	10
Malat1	1.74e-17	0.806263	1	0.945	5.8e-13	10
Tshz2	2.1e-17	1.3895	0.98	0.6	7.02e-13	10
Jsrp1	2.25e-17	1.07197	0.592	0.154	7.49e-13	10
Trpc5	6.88e-17	1.18011	0.694	0.235	2.3e-12	10
Gmpr	7.39e-17	1.30989	0.959	0.612	2.47e-12	10
Abcd4	1.09e-16	1.0053	0.551	0.148	3.63e-12	10
Lmo3	2.04e-16	1.19131	1	0.722	6.8e-12	10
Sema6d	9.77e-16	0.944682	0.714	0.249	3.26e-11	10
Sez6	1.41e-15	1.05538	1	0.938	4.7e-11	10
Gnas	1.83e-15	1.20229	0.98	0.902	6.11e-11	10
Sema3a	2.08e-15	1.00946	0.592	0.173	6.94e-11	10
Bcl11b	2.46e-15	1.44776	0.98	0.765	8.21e-11	10
Slc2a13	2.56e-15	1.03445	0.776	0.295	8.54e-11	10
Rtn4rl1	2.6e-15	0.768615	0.735	0.262	8.67e-11	10
Pcdh19	3.87e-15	1.22198	0.959	0.502	1.29e-10	10
Fras1	4.25e-15	0.940124	0.673	0.231	1.42e-10	10
Lypd1	8.74e-15	1.18945	1	0.65	2.92e-10	10
Arhgap6	3.56e-14	1.22718	0.918	0.524	1.19e-09	10
Atp6ap1l	4.04e-14	0.785027	0.265	0.039	1.35e-09	10
Sox8	4.66e-14	0.922052	0.714	0.266	1.56e-09	10
Asb4	8.01e-61	1.87146	0.692	0.049	2.67e-56	11
Sema3c	8.45e-55	2.3226	0.897	0.109	2.82e-50	11
Tac1	3.57e-42	4.38703	0.949	0.191	1.19e-37	11
Stmn2	1.68e-23	1.97377	1	0.793	5.59e-19	11
Arhgap36	1.4e-21	2.54741	0.718	0.173	4.66e-17	11
Clstn2	1.95e-21	1.23764	0.769	0.196	6.5e-17	11
Sst	2.42e-20	2.73286	0.897	0.35	8.08e-16	11
Gfra2	1.31e-19	1.31315	0.795	0.23	4.39e-15	11
Pdyn	2.6e-17	1.47272	0.949	0.376	8.68e-13	11
As3mt	1.13e-15	0.985045	0.436	0.077	3.78e-11	11
Luzp2	2.33e-15	1.35862	0.692	0.217	7.78e-11	11
Sphkap	5.72e-15	1.24892	0.795	0.292	1.91e-10	11
Rph3a	2.94e-14	1.08608	0.974	0.527	9.83e-10	11
Pam	4.25e-14	1.28275	0.949	0.549	1.42e-09	11
Nell1	1.51e-13	1.33636	0.821	0.397	5.02e-09	11
Gad2	7.94e-13	0.959165	1	0.968	2.65e-08	11
Slc18a2	1.39e-12	0.798272	0.385	0.078	4.64e-08	11
Ppp1r9a	1.58e-12	1.45192	1	0.886	5.28e-08	11
Nos1	3.72e-12	1.27393	0.641	0.224	1.24e-07	11
Ecel1	9.62e-12	1.22298	0.923	0.527	3.21e-07	11
Isl1	4.51e-11	0.874878	0.718	0.263	1.5e-06	11
Col11a1	5.95e-11	0.92805	0.462	0.122	1.99e-06	11
Gnas	1.04e-10	0.965821	1	0.902	3.48e-06	11
Dgkk	1.16e-10	0.98412	0.641	0.242	3.86e-06	11
Gpr101	2.81e-10	1.20558	0.795	0.388	9.37e-06	11
Rasgrf1	6.93e-10	0.909625	1	0.784	2.31e-05	11
Kcnh7	7.74e-10	0.762016	0.692	0.284	2.58e-05	11
Zcchc12	5.96e-09	0.855951	1	0.982	0.000198845	11
Plekha7	1.05e-08	0.881065	0.615	0.252	0.000349286	11
Arhgdig	1.68e-08	0.925216	0.974	0.67	0.000560202	11
Gpx3	2.51e-08	0.91527	0.718	0.306	0.000837529	11
Cbln2	5.93e-08	1.1384	0.436	0.14	0.00197776	11
Sh3gl2	8.63e-08	0.811417	1	0.845	0.00287932	11
Cpne8	1.34e-07	0.86686	0.513	0.205	0.00446745	11
Hs3st4	1.44e-07	0.955007	0.513	0.194	0.00480336	11
Meis2	1.47e-07	0.895608	0.923	0.759	0.00490518	11
Pcdh10	2.53e-07	1.0737	0.744	0.453	0.0084555	11
Gm10800	2.7e-07	1.35032	0.897	0.629	0.00901473	11
Syt4	2.79e-07	0.8818	1	0.872	0.00930369	11
Tle4	5.58e-07	0.818716	0.667	0.323	0.0186376	11
Camk1	7.07e-07	0.823723	0.846	0.473	0.0235953	11
Pcsk1n	1.27e-06	1.0697	1	0.994	0.0423698	11
Plagl1	1.39e-06	0.961928	0.359	0.117	0.0462968	11
Hmgcs1	2.33e-06	1.0088	0.821	0.555	0.0776805	11
Kcna4	3.03e-06	0.752492	0.59	0.288	0.101149	11
Zfhx4	3.56e-06	0.867498	0.564	0.272	0.118948	11
Plcxd3	5.1e-06	0.762032	0.769	0.476	0.170098	11
Slc6a1	6.18e-06	0.865135	0.846	0.597	0.206177	11
Vstm2a	8.49e-06	0.765665	0.923	0.68	0.283439	11
Plcb4	1e-05	0.876811	0.59	0.285	0.333702	11
Syn2	1.15e-31	0.776215	0.986	0.966	3.83e-27	12
Gnas	3.85e-27	0.849092	0.964	0.893	1.28e-22	12
Fxyd6	1.24e-25	0.787201	0.95	0.614	4.15e-21	12
Ttll7	3.99e-24	0.829975	0.9	0.805	1.33e-19	12
Syt4	1.48e-23	0.864146	0.945	0.863	4.95e-19	12
Nefl	2.25e-22	0.84371	0.941	0.728	7.5e-18	12
Gm26870	2.86e-22	1.45944	0.814	0.598	9.55e-18	12
Gm10800	1.11e-21	0.928751	0.832	0.599	3.72e-17	12
Pcp4	1.97e-20	1.12876	0.85	0.617	6.59e-16	12
Ptprf	1.6e-19	0.789095	0.8	0.624	5.33e-15	12
Pcdh7	1.6e-19	0.841961	0.85	0.672	5.34e-15	12
Doc2a	3.8e-18	0.827155	0.745	0.447	1.27e-13	12
Atp2b1	4.31e-18	0.775261	0.955	0.861	1.44e-13	12
Gad2	6.18e-18	0.881561	0.968	0.968	2.06e-13	12
Grin3a	1.87e-17	0.788726	0.623	0.36	6.25e-13	12
Gpr101	8.13e-17	0.763046	0.614	0.359	2.71e-12	12
Poldip2	1e-15	1.43506	0.164	0.466	3.34e-11	12
Gria3	1.18e-13	0.789237	0.845	0.71	3.94e-09	12
Pam	3.19e-12	0.804162	0.727	0.529	1.07e-07	12
Sparcl1	6.04e-12	1.07658	0.605	0.389	2.02e-07	12
A230065H16Rik	5.61e-10	0.752806	0.277	0.124	1.87e-05	12
Ier3ip1	1.41e-07	0.762011	0.459	0.68	0.00470628	12
Rhov	2.16e-06	1.37196	0.364	0.228	0.0721295	12
Plekha5	0.00461473	1.57188	0.518	0.462	1	12
Cyp26b1	1.8e-69	1.57194	0.753	0.211	6.02e-65	13
Upk1b	3.64e-65	1.19777	0.713	0.191	1.21e-60	13
Nr2f2	4.67e-56	1.17491	0.587	0.138	1.56e-51	13
Dlk1	1.1e-55	1.38021	0.695	0.211	3.67e-51	13
Nnat	3.44e-48	0.989987	0.996	0.856	1.15e-43	13
Myh7	1.37e-38	1.16941	0.7	0.342	4.56e-34	13
Ncald	2.88e-37	1.11617	0.951	0.832	9.6e-33	13
Atp2b4	3.39e-31	0.954797	0.955	0.799	1.13e-26	13
Id4	1.87e-26	0.847162	0.771	0.449	6.23e-22	13
Mtfp1	1.8e-22	0.859589	0.861	0.711	6e-18	13
Calb1	1.03e-19	0.896542	0.839	0.654	3.43e-15	13
Ralyl	1.48e-19	0.943513	0.852	0.726	4.94e-15	13
Syt10	2.32e-18	0.83143	0.417	0.181	7.74e-14	13
Sox5	8.98e-16	0.79867	0.404	0.179	3e-11	13
Oprk1	2.23e-13	1.04006	0.332	0.153	7.44e-09	13
Tmem47	1.7e-11	0.782151	0.507	0.319	5.67e-07	13
Gm26870	0.000423504	0.981073	0.659	0.626	1	13
