# Supplementary material for: Multimodal mapping of cell types and projections in the central nucleus of the amygdala
Source: eLife. 2023 Jan 20;12:e84262. doi: 10.7554/eLife.84262 (PMC9977318; doi:10.7554/eLife.84262)
Supplement: Supplementary file 4. — Percent of neurons that co-express selected marker genes (Prkcd, Sst, Crh, Tac2, Nts, Pdyn, Drd1, Drd2, Penk, Tac1, Cartpt, Cyp26b1, Nefm) are shown, with darker red color representing a higher percent of co-expression. [file elife-84262-supp4.xlsx]

## Sheet: Sheet1
CeC
	Prkcd	Sst	Crh	Tac2	Nts	Pdyn	Drd1	Drd2	Penk	Tac1	Cartpt	Cyp26b1	Nefm	Total number of x gene- (in row) positive cells	Percent of x gene- (in row) positive cells
Prkcd	-	0.2649	0.0104	0.0126	0.0179	0.2991	0	0.0945	0.9606	0.0439	0.453125	0.270833	0.00892857	1344	0.1555
Sst	0.1935	-	0.0206	0.17	0.069	0.7598	0.0098	0.0299	0.8484	0.037	0.128261	0.0597826	0.0168478	2417	0.2797
Crh	0.1489	0.4043	-	0.3936	0.3511	0.6383	0.1277	0.234	0.883	0.0213	0.0957447	0.0319149	0.0425532	94	0.0109
Tac2	0.042	0.7728	0.0914	-	0.284	0.8617	0.037	0.0321	0.7827	0.037	0.0148148	0.0222222	0.0691358	405	0.0469
Nts	0.1395	0.7384	0.1919	0.6686	-	0.8198	0	0.0407	0.8547	0.0233	0.127907	0.0290698	0.0697674	172	0.0199
Pdyn	0.1948	0.6773	0.0291	0.1691	0.0683	-	0.0707	0.0402	0.8566	0.0562	0.123062	0.108043	0.0343992	2064	0.2389
Drd1	0	0.0807	0.0538	0.0673	0	0.6547	-	0.1749	0.9058	0.2646	0.0358744	0.183857	0.219731	223	0.0258
Drd2	0.0771	0.0334	0.0133	0.0079	0.0042	0.0504	0.0237	-	0.9551	0.0073	0.0151699	0.398058	0.120146	1648	0.1907
Penk	0.1787	0.2161	0.0115	0.0439	0.0204	0.2448	0.028	0.2179	-	0.0248	0.107573	0.272186	0.0589783	7223	0.8359
Tac1	0.2823	0.3254	0.0096	0.0718	0.0191	0.555	0.2823	0.0574	0.8565	-	0.263158	0.0334928	0.129187	209	0.0242
Cartpt	0.713951	0.276671	0.010551	0.007034	0.0257913	0.297773	0.00937866	0.0293083	0.910903	0.0644783	-	0.094959	0.00820633	853	0.0987
Cyp26b1	0.178169	0.0538424	0.00146843	0.00440529	0.00244738	0.109153	0.0200685	0.321096	0.96231	0.00342633	0.0396476	-	0.109153	2043	0.2364
Nefm	0.0246914	0.063786	0.00823045	0.0576132	0.0246914	0.146091	0.100823	0.407407	0.876543	0.0555556	0.0144033	0.458848	-	486	0.0562
CeL
	Prkcd	Sst	Crh	Tac2	Nts	Pdyn	Drd1	Drd2	Penk	Tac1	Cartpt	Cyp26b1	Nefm	Total number of x gene- (in row) positive cells	Percent of x gene- (in row) positive cells
Prkcd	-	0.353659	0.0650407	0.268293	0.158537	0.581301	0	0.0162602	0.865854	0.00813008	0.48374	0.313008	0.00406504	246	0.0869258
Sst	0.095815	-	0.171806	0.61674	0.422907	0.839207	0.00991189	0.027533	0.838106	0.0374449	0.0495595	0.0859031	0.0286344	1194	0.421908
Crh	0.0751174	0.732394	-	0.910798	0.849765	0.962441	0.00469484	0.0375587	0.788732	0.00469484	0.0140845	0.00938967	0.0328638	213	0.075265
Tac2	0.0781991	0.663507	0.229858	-	0.565166	0.913507	0.00236967	0.0248815	0.732227	0.0106635	0.0319905	0.0390995	0.028436	844	0.298233
Nts	0.0744275	0.732824	0.34542	0.910305	-	0.954198	0	0.0305344	0.833969	0.00381679	0.0171756	0.0152672	0.028626	524	0.185159
Pdyn	0.121702	0.648511	0.174468	0.65617	0.425532	-	0.0144681	0.0297872	0.773617	0.0255319	0.0697872	0.0859574	0.0374468	1175	0.415194
Drd1	0	0.391304	0.0434783	0.0869565	0	0.73913	-	0.0869565	0.913043	0.0434783	0.0434783	0	0.304348	23	0.00812721
Drd2	0.0225989	0.141243	0.0451977	0.118644	0.0903955	0.19774	0.0112994	-	0.887006	0.0112994	0.079096	0.20904	0.265537	177	0.0625442
Penk	0.101768	0.363593	0.0802676	0.29527	0.208791	0.434305	0.0100334	0.0750119	-	0.0195891	0.0917344	0.285714	0.0688008	2093	0.739576
Tac1	0.037037	0.62963	0.0185185	0.166667	0.037037	0.555556	0.0185185	0.037037	0.759259	-	0.037037	0.0925926	0.203704	54	0.0190813
Cartpt	0.543379	0.205479	0.0136986	0.123288	0.0410959	0.374429	0.00456621	0.0639269	0.876712	0.00913242	-	0.13242	0.00456621	219	0.0774
Cyp26b1	0.114925	0.116418	0.00298507	0.0492537	0.0119403	0.150746	0	0.0552239	0.892537	0.00746269	0.0432836	-	0.0328358	670	0.2367
Nefm	0.00584795	0.152047	0.0409357	0.140351	0.0877193	0.25731	0.0409357	0.274854	0.842105	0.0643275	0.00584795	0.128655	-	171	0.0604
CeM
	Prkcd	Sst	Crh	Tac2	Nts	Pdyn	Drd1	Drd2	Penk	Tac1	Cartpt	Cyp26b1	Nefm	Total number of x gene- (in row) positive cells	Percent of x gene- (in row) positive cells
Prkcd	-	0.0175439	0	0	0.0350877	0.0526316	0	0.0526316	0.842105	0.0350877	0.3333	0.333333	0.140351	57	0.00456914
Sst	0.000597372	-	0.0107527	0.0555556	0.0412186	0.29092	0.0740741	0.0215054	0.469534	0.284349	0.0215	0.0800478	0.208483	2266	0.181643
Crh	0	0.246575	-	0.465753	0.205479	0.630137	0.191781	0.123288	0.589041	0.0821918	0.0822	0.0136986	0.561644	73	0.0058517
Tac2	0	0.0856354	0.0313076	-	0.0460405	0.28453	0.053407	0.158379	0.621547	0.0294659	0.0562	0.00552486	0.807551	1086	0.0870541
Nts	0.00729927	0.251825	0.0547445	0.182482	-	0.284672	0.040146	0.0656934	0.678832	0.0620438	0.0292	0.00729927	0.434307	274	0.0219639
Pdyn	0.00196721	0.319344	0.0301639	0.202623	0.0511475	-	0.183607	0.102295	0.611803	0.233443	0.0505	0.0177049	0.492459	1525	0.122244
Drd1	0	0.241715	0.0272904	0.11306	0.0214425	0.545809	-	0.0175439	0.729045	0.150097	0.0487	0.00194932	0.551657	513	0.0411222
Drd2	0.0039267	0.0471204	0.0117801	0.225131	0.0235602	0.204188	0.0117801	-	0.437173	0.0418848	0.0366	0.109948	0.615183	764	0.0612425
Penk	0.00928254	0.152002	0.00831561	0.130536	0.0359698	0.180429	0.0723264	0.064591	-	0.0754206	0.028	0.14736	0.381938	5171	0.414509
Tac1	0.00237812	0.565993	0.00713436	0.0380499	0.020214	0.423306	0.0915577	0.0380499	0.463734	-	0.0333	0.0142687	0.326992	841	0.0674148
Cartpt	0.0785124	0.14876	0.0247934	0.252066	0.0330579	0.318182	0.103306	0.115702	0.599174	0.115702	-	0.0454545	0.454545	242	0.0194
Cyp26b1	0.0180266	0.127135	0.000948767	0.0056926	0.00189753	0.0256167	0.000948767	0.0796964	0.72296	0.0113852	0.0104364	-	0.166034	1054	0.0845
Nefm	0.00212033	0.0924993	0.0108667	0.232441	0.0315399	0.199046	0.0750066	0.124569	0.523456	0.0728863	0.0291545	0.0463822	-	3773	0.3024
