# Supplementary material for: Multimodal mapping of cell types and projections in the central nucleus of the amygdala
Source: eLife. 2023 Jan 20;12:e84262. doi: 10.7554/eLife.84262 (PMC9977318; doi:10.7554/eLife.84262)
Supplement: Supplementary file 5. [file elife-84262-supp5.xlsx]

## Sheet: Sheet1
Figure	Sample size	Statistical Test	Values
Figure 3F soma volume		Welch's one-way ANOVA (parametric without assumption of equal variance) followed by unpaired Welch's t-test compared to the population mean with Benjamini, Hochberg, and Yekutieli false discovery rate adjustment. Effect size as determined by Cohen's d greater than 0.5 shown.	Average cell body volume: 1771.258µm3, p<2e-10, ****
			Compare to average soma volume:
	MC-1: 355		MC-1: 2506.878µm3, Cohen's d: 1.27, p=6.9e-65, ****
	MC-8: 2560		MC-8: 2736.008 µm3, Cohen's d: 1.88, p=0 ****
	MC-20: 2530		MC-20: 1229.274 µm3, Cohen's d: 0.52, p=3.1e-317, ****
	MC-21: 2835		MC-21: 906.458 µm3, Cohen's d: 1.03, p=0, ****
	MC-22: 3648		MC-22: 998.065 µm3, Cohen's d: 0.92, p=0, ****
Figure 3F Solidity	-	Kruskal-Wallis rank sum test (non-parametric without assumption of equal variance), Wilcoxon rank sum test compared to the population mean with Benjamini, Hochberg, and Yekutieli false discovery rate adjustment	Kruskal-Wallis test: p<2.2e-16, ****
			No comparison showed effect size (as determined by glass rank biserial correlation coefficient, or rg) greater than 0.28.
Figure 3F minor-to-major axis ratio		Kruskal-Wallis rank sum test (non-parametric without assumption of equal variance), Wilcoxon rank sum test compared to the population mean with Benjamini, Hochberg, and Yekutieli false discovery rate adjustment. Effect size as determined by glass rank biserial correlation coefficient, or rg, greater than 0.28 shown.	Kruskal-Wallis test: p<2.2e-16, ****
			Compare to average ratio:
	MC-9: 173		MC-9: Wilcox: p<2.2e-16, ****
Figure 6B	-	Permutation test (see Methods)	p<0.01, **
Figure 6D	-	Permutation test	p<0.01, **
Figure 2—figure supplement 3C	Ezr: -SDS (n=8), +SDS (n=8)	Unpaired Student's t-test	Average Ezr spot counts: -SDS: 65.1, +SDS: 60.1, p>0.05
	Igf1: -SDS (n=15), +SDS (n=13)		Average Igf1 spot counts: -SDS: 40.2, +SDS: 43.6, p>0.05
Figure 2—figure supplement 3G, H	as shown in figure	least-square linear regression	as indicated in Figure
Figure 5—figure supplement 1F	as shown in figure	Chi-square test	BNST: p=0.0007, ***
			PBN: p=1.1e-9, ****
			lateral SN: p=0.03, *
Figure 6—figure supplement 1A	-	Permutation test	p<0.01, **
Figure 6—figure supplement 1C	-	Permutation test	p<0.01, **
Figure 6—figure supplement 1F	-	Permutation test	p<0.01, **
